# Supplementary material for: Hydrogen-bond-driven synergistic regulation of crystallization and interfacial coupling in 1.85 eV wide-bandgap perovskites for high-performance organic tandem solar cells
Source: Royal Society of Chemistry journal article supplement (doi:10.1039/d5ee06814b), 2026-01-01
Supplement: d5ee06814b1.pdf [file d5ee06814b1.pdf]

## Electronic Supporting Information

### **Hydrogen-bond-driven synergistic regulation of crystallization and interfacial coupling in 1.85 eV wide-bandgap perovskites for high-performance organic tandem solar cells**

Qi Wang<sup>a</sup>, Yingying Wang<sup>a</sup>, Wei Hui<sup>b</sup>, Lin Song<sup>b</sup>, Xiaopeng Xu<sup>a</sup>, Yihui Wu<sup>\*a</sup>, and Qiang Peng<sup>\*a</sup>

<sup>a</sup> School of Chemical Engineering, State Key Laboratory of Advanced Polymer Materials, Engineering Research Center of Alternative Energy Materials & Devices, Ministry of Education, Sichuan University, Chengdu 610065, P. R. China

<sup>b</sup> Frontiers Science Center for Flexible Electronics (FSCFE), Institute of Flexible Electronics (IFE), Northwestern Polytechnical University, Xi'an 710072, P. R. China

\*Corresponding authors.

E-mails: yihuiwu@scu.edu.cn (Y.W.); qiangpeng@scu.edu.cn (Q.P.)

## Methods

### Materials

All the chemicals were used directly without further purification. Lead iodide ( $\geq 99.999\%$ ), lead bromide ( $\geq 99.999\%$ ), formamidinium iodide (FAI, 99.9%),  $\text{NiO}_x$  nanoparticle (99.999%) and  $\text{C}_{60}$  (99.5%) were purchased from Advanced Election Technology Co. Ltd. Anisole was purchased from Aladdin. RbI (99.9%), dimethylformamide (DMF), dimethyl sulfoxide (DMSO), chlorobenzene (CB), isopropyl alcohol (IPA) and ethyl alcohol (EtOH, 99.5%) were purchased from Sigma-Aldrich. Cesium iodide (CsI, 99.999%) was purchased from Alfa-Aesar. Bathocuproine (BCP, 99%) were purchased from Xi'an Yuri Solar Co. Ltd. (4-(3,6-dimethyl-9H-carbazole-9-yl)butyl) phosphonic acid (Me-4PACz,  $>99.0\%$ ) and propanedioic acid (PPDA, 99%) were purchased from TCI. Propane-1,3-diammonium iodide ( $\text{PDAI}_2$ ,  $\geq 99.5\%$ ) was purchased from Xi'an e-Light New Material Co, Ltd. PM6 and BTP-eC9 were purchased from Solarmer Materials Inc. PNDIT-F3N was purchased from Volt-Amp Optoelectronic Tech. Co., Ltd, Dongguan, China.

### Device fabrication

All perovskite devices were fabricated on the cleaned and patterned FTO substrates (AGC22-8A, Advanced Election Technology Co. Ltd.). The patterned FTO glass substrates were cleaned with a surfactant solution, then soaked in deionized water, acetone, and ethanol in the ultrasonic bath for 20 min each.

Single-junction Wide bandgap (WBG) perovskite sub-cells: After dried with a nitrogen gun and cleaned with ultraviolet ozone for 15 min, the substrates were spin-coated with a thin layer of  $\text{NiO}_x$  nanoparticle (5 mg/mL aqueous solution) at 2000 rpm for 30 s, and annealed in ambient air at 150 °C for 10 min, then cooled down naturally and transferred to glove box. After that, Me-4PACz (0.5 mg/mL in EtOH) was deposited on the  $\text{NiO}_x$  at 3000 rpm for 30 s and annealed at 100 °C for 10 min.

The precursor solution of 1.0 M  $\text{Cs}_{0.2}\text{FA}_{0.8}\text{PbI}_{1.5}\text{Br}_{1.5}$  was prepared by dissolving 137.5 mg of FAI, 52.0 mg of CsI, 115.2 mg of  $\text{PbI}_2$ , and 275.2 mg of  $\text{PbBr}_2$  in 1 mL of mixed solvents of DMF and DMSO (v/v = 4:1), which was stirred for 12 h before use. The perovskite solution was filtered with 0.22  $\mu\text{m}$  PTFE filter. After that, 70  $\mu\text{L}$  of perovskite ink was deposited by spin coating at 1000 rpm for 10 s with a ramp of 800, and 6000 rpm for 40 s with a ramp of 2000, 20 seconds into the second step, 110  $\mu\text{L}$  of anisole was deposited onto the substrate. For the PPDA containing samples, different concentrations of PPDA were dissolved in the anti-solvent (Anisole). The wet film was then annealed at 100 °C for 15 min. After the perovskite film was cooled down to room temperature, 50  $\mu\text{L}$  of 1 mg/mL  $\text{PDAI}_2$  isopropanol/chlorobenzene (v/v = 2:1) solution was coated on the perovskite at 4500 rpm for 25 s and annealed at 100 °C for 5 min. Then 20 nm of  $\text{C}_{60}$  was thermally evaporated. After that, 20 nm of  $\text{SnO}_x$  was deposited on ALD system at around 100 °C. Finally, 120 nm of Ag were thermally evaporated.

Single-junction organic sub-cells: A 15 nm of  $\text{MoO}_x$  was thermally evaporated onto FTO. To form the bulk heterojunction (BHJ). PM6, BTP-eC9,  $\text{PC}_{61}\text{BM}$  with a weight ratio of 1:1.2:0.3 were dissolved in chloroform (polymer concentration: 7.5 mg/mL with 0.5 vol % of DIO as an additive) and stirred at 70 °C for 2 h. Then, 25  $\mu\text{L}$  of above solution was directly spin-coated on the  $\text{MoO}_x$  layer at 2500 rpm for 30 s in the  $\text{N}_2$  glove box at room temperature, followed by thermal annealing at 90 °C for 5 min. After cooling, a PNDIT-F3N/methanol (0.5 mg/mL) was spin-coated on the active layer at 3000 rpm for 30 s to form the electron transport layer. Finally, 100 nm of Ag were deposited by thermal evaporation.

Perovskite/organic tandem solar cells: After completing the deposition of the  $\text{C}_{60}$  layer, substrates were transferred to atomic layer deposition chamber, 20 nm of  $\text{SnO}_x$  was deposited on ALD system at around 100 °C. After the ALD deposition, 1.0 nm of Au and 15 nm of  $\text{MoO}_x$  were thermally evaporated on top of the  $\text{SnO}_x$ , respectively, to form the interfacial

recombination layer for the tandem cells. The organic BHJ and electron layer were then sequentially spin-coated on MoO<sub>x</sub>, as mentioned above.

## **Characterization**

The top-view and cross-sectional SEM images were acquired using a Hitachi S4800 field-emission scanning electron microscopy system manufactured by Hitachi High Technologies Corporation. AFM was recorded from Bruker Innova atomic microscopy. X-ray Diffraction (XRD) patterns of the perovskite films were recorded on a Bruker D8 advance instrument equipped with Cu K $\alpha$  radiation (40 kV, 40 mA). Scanning was performed at a rate of 7°/min in the 2 $\theta$  range from 5-45° with a step size of 0.02 s. The UV-Visible absorption spectra of the solution and thin films were measured from the absorbance model (without integrating sphere) using PerkinElmer Lambda 950 UV-vis spectrophotometer with a scanning rate of 600 nm/min in the range of 900-200 nm at a step bandwidth of 1 nm. The type of baseline calibration was the 100% transmittance baseline. The in-situ UV-vis absorption spectroscopy was recorded with Puguangweishi equipped deuterium light sources from 300 nm to 1100 nm in absorbance mode. The Grazing-incidence wide-angle X-ray scattering (GIWAXS) measurements were conducted at the BL14B1 beamline of Shanghai Synchrotron Radiation Facility (SSRF). The grazing incidence angle was 0.4°. The depth profile of the perovskite film on the FTO/NiO<sub>x</sub>/Me-4PACz substrate was recorded using ToF-SIMS (model ION ToF-SIMS 5). The pulsed primary Bi<sup>+</sup> ion source was operated at 30 keV and 0.5 pA on a 100\*100  $\mu\text{m}^2$  area to bombard the sample surface to produce secondary ions. For negative polarity, the sputtering was performed with a Cs ion beam operated at 1.0 keV and 30 nA on a 300\*300  $\mu\text{m}^2$  area. For positive polarity, the sputtering was performed with a O<sub>2</sub> ion beam operated at 1 keV and 60 nA on a 300\*300  $\mu\text{m}^2$  area. The steady PL spectra and time-resolved PL decay measurements were performed using an FLS980 Series of Fluorescence Spectrometers. For the PL measurement, the excitation source was a monochromatized Xe lamp (peak wavelength at 500 nm with a line width of 2 nm). For TRPL, the excitation source was a

supercontinuum pulsed laser sources (YSL SC-PRO) with an excitation wavelength at 514 nm and a repetition rate of 0.1 MHz. Monochromatic external quantum efficiency (EQE) spectra were recorded as functions of wavelength with a monochromatic incident light of  $1 \times 10^{16}$  photons  $\text{cm}^{-2}$  in alternating current mode with a bias voltage of 0 V (QE-R3011). The light intensity of the solar simulator was calibrated by a standard silicon solar cell provided by PV Measurements. A Fourier transform infrared spectroscopy (FT-IR, Thermo Fisher Nicolet Is5) was used to collect the FT-IR spectral data for the samples without and with SA-derivative. Urbach energy ( $E_U$ ) was detected by HS-EQE (ENLITECH PECT-600) and obtained by fitting the tail of the band. The liquid state  $^1\text{H}$  nuclear magnetic resonance (NMR) measurements were recorded on JNM-ECZ400S/L1 spectrometer (TMS as an internal standard ( $\delta = 0$ )). UPS and XPS spectra were recorded by a Thermo-Fisher ESCALAB Xi+ system. For XPS measurement, radiation was produced by a monochromatic 75 W Al  $K\alpha$  excitation centered at 1486.7 eV. For UPS measurement, He I ultraviolet radiation source of 21.22 eV was used. KPFM measurements were performed on a BRUKER ICON atomic force microscope under a Peak-Force KPFM mode, and the scan rate was 0.5 Hz during the testing process. The samples were scanned in at least three random locations to ensure reliable results. The EQE of electroluminescence ( $\text{EQE}_{\text{EL}}$ ) spectra of the PSCs were detected by ENLITECH REPS- $V_{\text{OC}}$  under dark conditions. I-V curves were performed at a test range of 0-1.5 V with a step length of 0.02, EL was measured at an applied voltage of 1.2 V, and then I-V and EL were fitted to obtain  $\text{EQE}_{\text{EL}}$ . A LuQY Pro radiative efficiency meter (Model no. LP20-32) was used to perform QFLS measurements. The QFLS values were derived from fitting the high-energy slope of the photoluminescence peak to generalized Planck's law under the assumption that absorptance equals 1 within this energy range. These calculations were automatically performed by the integrated measurement software, which provided direct values of QFLS. The current-voltage characteristics were measured by Keithley 2400 source and the solar simulator with standard AM 1.5G ( $100 \text{ mW cm}^{-2}$ , SAN EI: Japan) under ambient

conditions. The light intensity was calibrated by a Newport-calibrated standard silicon solar cell. The  $J$ - $V$  curves were measured by forward (-0.1 V to 1.5 V forward bias) or reverse (1.5 V to -0.1 V) scans with a voltage step of 20 mV and a delay time of 100 ms for each point. The active area of a PSC is 0.12 cm<sup>2</sup>. The  $J$ - $V$  curves for all devices were obtained by masking the cell with a metal mask of 0.09 cm<sup>2</sup> in area. The devices for long-term stability measurement were stored in a N<sub>2</sub>-filled glovebox. After various periods of time, the  $J$ - $V$  measurements were performed. The dynamic MPP tracking was carried out in a home-made N<sub>2</sub>-filled box under 1 sun continuous illumination (white light LED array) with temperature of ~45 °C (Multi-Channels Solar Cells Stability Test System, Wuhan 91PVKSolar Technology Co. Ltd, China). The MPPT was automatically recalculated every 2 h by tracking the  $J$ - $V$  curve.

## Supplementary Notes

### Note S1. Surface free energy

The surface free energy of solids ( $\gamma_s$ ) can be modeled according to the assumption that the total surface energy of solids is contributed from polarity and dispersity ( $\gamma_s = \gamma_s^p + \gamma_s^d$ ).<sup>1-3</sup> Basically, the liquid droplet on flat surface following Young's equation:

$$\gamma_{sv} - \gamma_{sl} = \gamma_{lv} \cos \theta$$

Where,  $\gamma_{sv}$ ,  $\gamma_{sl}$  and  $\gamma_{lv}$  refer to interfacial tensions at solid-vapor, solid-liquid and liquid-vapor interfaces, respectively.  $\theta$  is the contact angle of a liquid on a solid surface.

By combining Good's equation:

$$\gamma_{sl} = \gamma_s + \gamma_l - 2(\gamma_s^d \gamma_l^d)^{1/2} - 2(\gamma_s^p \gamma_l^p)^{1/2}$$

The Owens-Wendt equation is as follows:

$$\frac{\gamma_l(1 + \cos \theta)}{2(\gamma_l^d)^{1/2}} = (\gamma_s^p)^{1/2} \frac{(\gamma_l^p)^{1/2}}{(\gamma_l^d)^{1/2}} + (\gamma_s^d)^{1/2}$$

Therefore, by plotting  $(\gamma_l^p)^{1/2}/(\gamma_l^d)^{1/2}$  versus left part of above equation, the surface free energy of solid  $\gamma_s$  can be calculated.

The above Owens-Wendt model is based on a smooth and homogeneous surface. Furthermore, according to Wenzel Theory, the roughness can be specified by correcting  $\theta$  with the roughness factor ( $r$ ):

$$\cos \theta_w = r \cos \theta_Y$$

$$r = \frac{A^{actual}}{A^{projected}}$$

Where,  $\theta_w$  is the predicted Wenzel contact angle,  $\theta_Y$  is the Young contact angle,  $A^{actual}$  is the solidliquid actual surface area,  $A^{projected}$  is the projected area.

#### **Note S2. PL and TRPL measurement**

The steady PL spectra and time-resolved PL decay measurements were performed using an FLS980 Series of Fluorescence Spectrometers. For the PL measurement, the excitation source was a monochromatized Xe lamp (peak wavelength at 500 nm with a line width of 2 nm). For TRPL, the excitation source was a supercontinuum pulsed laser sources (YSL SC-PRO) with an excitation wavelength at 514 nm and a repetition rate of 0.1 MHz. The TRPL decay curves were fitted using a bi-exponential function and the fitted data were summarized in Table S2.

$$f(t) = A_1 \exp\left(-\frac{t}{\tau_1}\right) + A_2 \exp\left(-\frac{t}{\tau_2}\right) + B$$

Where,  $\tau_1$  represent the fast decay process related to the bimolecular recombination, and  $\tau_2$  is the slow decay process associated with the trap-assisted recombination process of charge-carrier.<sup>4</sup> B is a constant for the baseline offset.  $A_1$  and  $A_2$  are constants, representing the contributions of the fast and slow components, respectively. The average PL decay lifetime was calculated using following equation:

$$\tau_{ave} = \frac{\sum A_i \tau_i^2}{\sum A_i \tau_i}$$

**Note S3. The electron density in the conduction band near the surface of perovskite films**

The electron density ( $n$ ) was calculated by the following equation:

$$n = N_C \exp \frac{E_C - E_F}{-k_B T}$$

$E_C$  is the energy levels at the bottom of the conduction band and  $E_F$  is the Fermi level;  $k_B$  is the Boltzmann constant and  $T$  is the absolute temperature,  $k_B T$  of 0.0259 eV was used for calculation at 300K.  $N_C$  denotes the densities of the conduction band states, which was calculated to be  $1.2 \times 10^{19} \text{ cm}^{-3}$  for FAPbI<sub>3</sub>.<sup>5</sup>

**Note S4. Calculation of the quasi-Fermi level splitting (QFLS) based on the PL quantum yield (PLQY)**

A LuQY Pro radiative efficiency meter (Model no. LP20-32) was used to perform QFLS measurements. These calculations were automatically performed by the integrated measurement software, which provided direct values of QFLS. The direct relation between QFLS and PLQY as the following equation:<sup>6</sup>

$$QFLS = QFLS_{rad} + k_B T \ln (PLQY) = k_B T \ln (PLQY \frac{J_G}{J_{0,rad}})$$

Where, QFLS is the difference between the electron and hole quasi-Fermi levels in the perovskite layer,  $k_B T$  of 0.0259 eV was used for calculation at 300 K.  $J_G$  is the generation current density under illumination, in this case, approximated to the short-circuit current density  $J_{SC}$  of devices.  $J_{0,rad}$  is the dark radiative recombination saturation current density.

**Note S5. SCLC measurement**

The electron-only devices were assembled for the SCLC measurement. The dark I-V curves of the electron-only and hole-only devices can be divided into three parts: Ohmic region, trap-filling limited region with a sharp increase in current and the trap-free Child's region.<sup>7</sup> The trap density,  $n_t$ , can be determined using following equation:



$$V_{TFL} = \frac{en_t L^2}{2\epsilon\epsilon_0}$$

Where,  $V_{TFL}$  is the trap-filled limit voltage,  $n_t$  is the trap density,  $L$  is the thickness of perovskite film,  $\epsilon$  is the relative dielectric constant of the perovskite,<sup>8</sup> and  $\epsilon_0$  is the vacuum permittivity.<sup>9</sup>

#### Note S6. EQE of EL

The EL spectra of both devices were recorded by a light emitting diode PL quantum-yield measurement system equipped with Enlitech REPS- $V_{OC}$  Source Measurement Unit. The voltage deficit ( $V_{loss}^{non-rad}$ ) related to the non-radiative recombination was calculated using the following equation:<sup>10-11</sup>

$$V_{loss}^{non-rad} = -\frac{k_B T}{q} \ln(EQE_{EL})$$

Where,  $k_B$  is the Boltzmann constant,  $T$  is absolute temperature,  $q$  is the elementary charge,  $EQE_{EL}$  is the EQE value of the device working as LED under the injection current equal to that of the  $J_{SC}$  of the solar cell.

#### Supplementary Figures

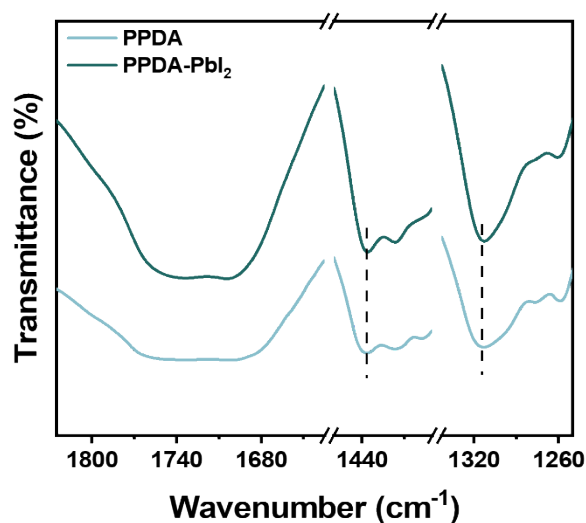

**Figure S1.** FT-IR spectra of PPDA and PPDAI-PbI<sub>2</sub> films.

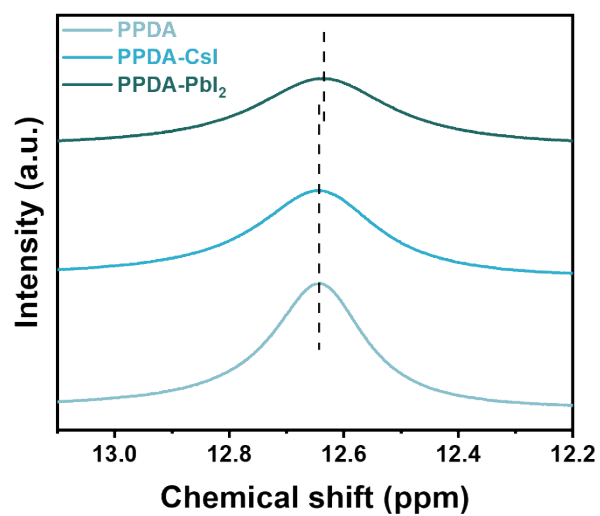

**Figure S2.** Liquid-state  $^1\text{H}$  nuclear magnetic resonance ( $^1\text{H}$ -NMR) spectra of PPDA, PPDA-CsI and PPDA-PbI<sub>2</sub>.

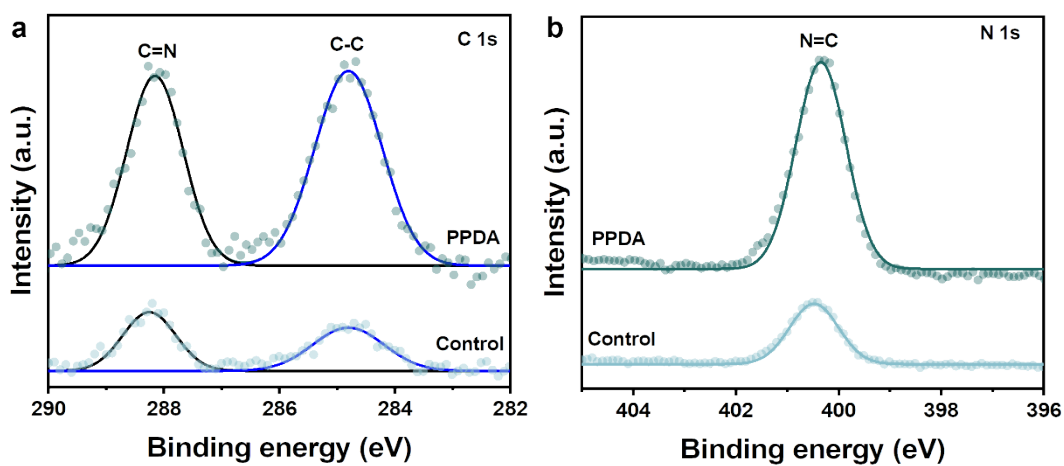

**Figure S3.** High resolution XPS spectra of (a) C 1s and (b) N 1s for the control and PPDA treated perovskite films.

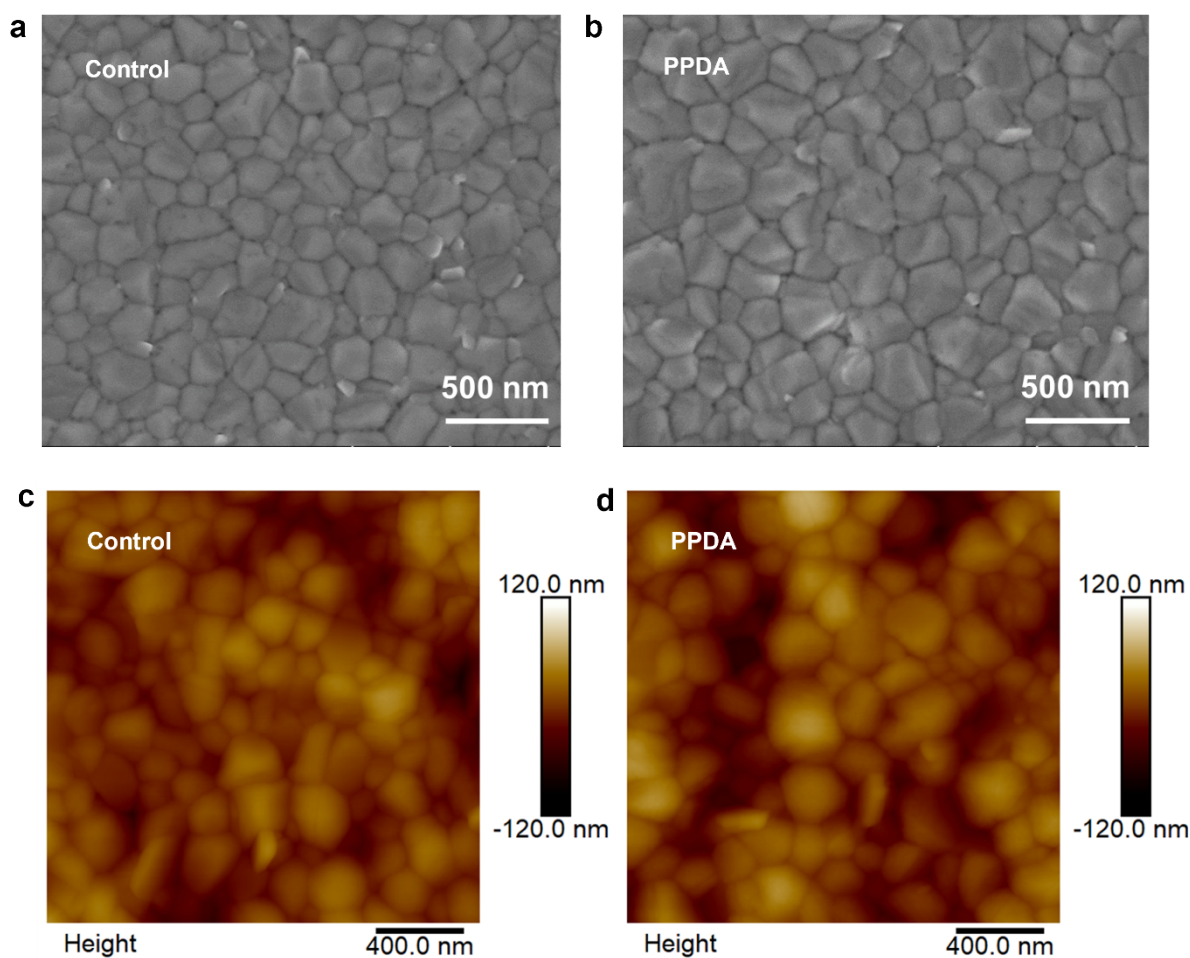

**Figure S4.** Top-viewed SEM images of (a) the control and (b) PPDA-treated perovskite films. AFM images of (c) the control and (d) PPDA-treated perovskite films.

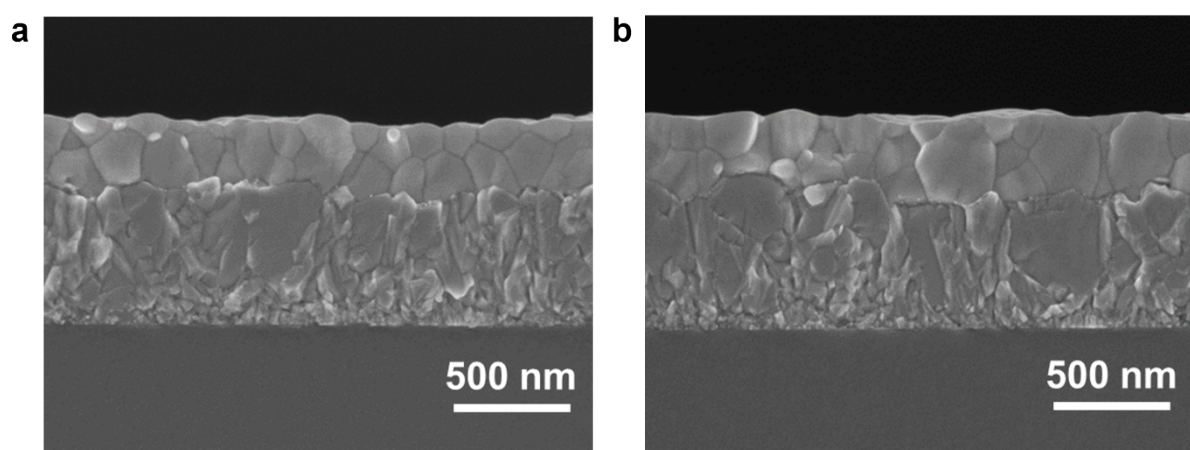

**Figure S5.** The cross-sectional SEM images of (a) the control and (b) PPDA-treated perovskite films.

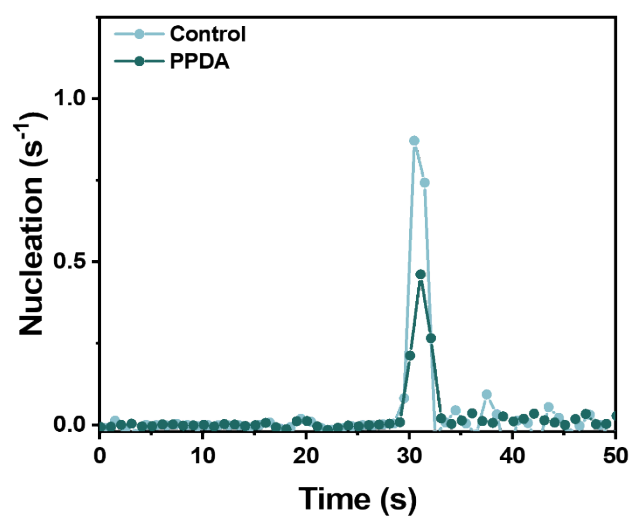

**Figure S6.** The calculation of nucleation rates for the control and PPDA-treated sample using first derivatives corresponded to in situ UV-vis spectra.

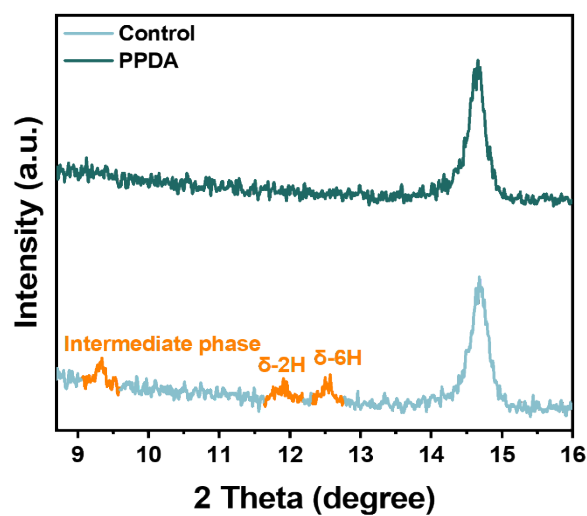

**Figure S7.** XPD patterns of the control and PPDA treated perovskite films.

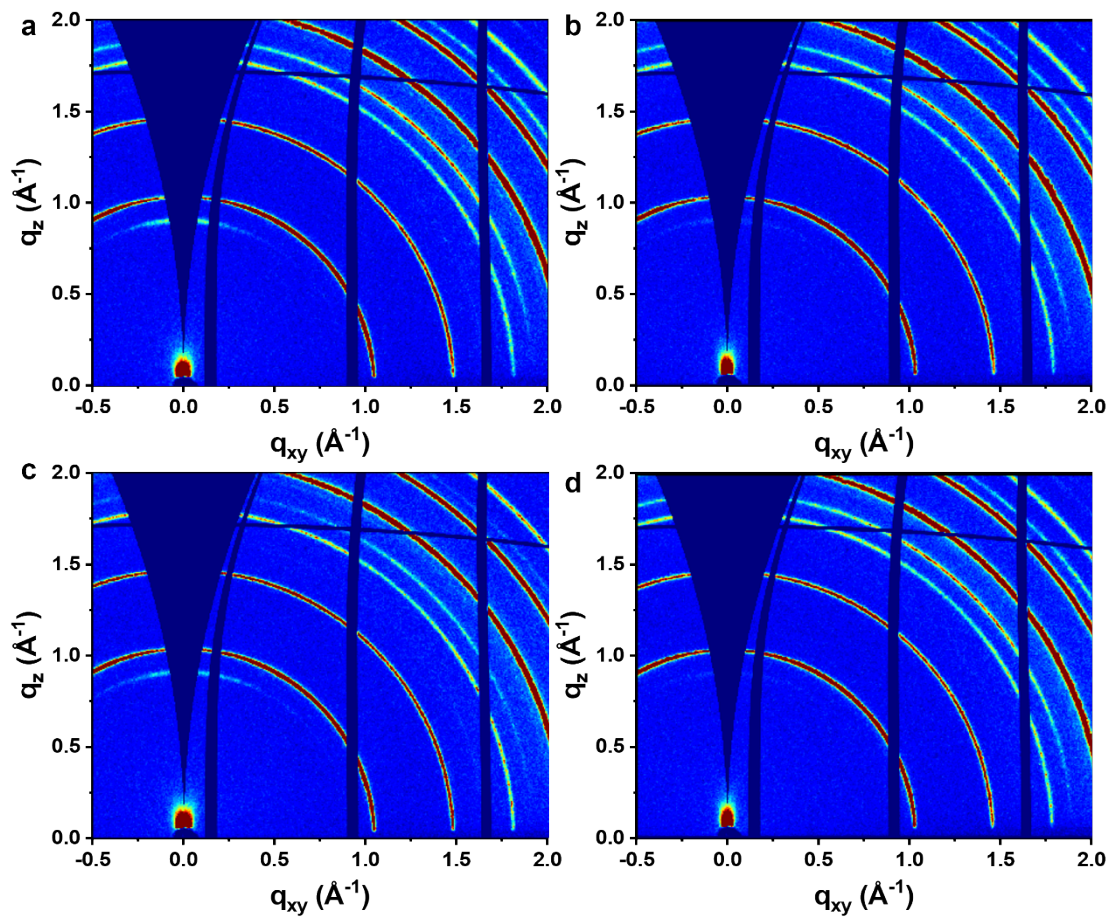

**Figure S8.** GIWAXS patterns of (a) the control, (b) PPDA, (c) PDAI<sub>2</sub>, (d) P-PDAI<sub>2</sub> treated perovskite films (incident angle = 0.4°).

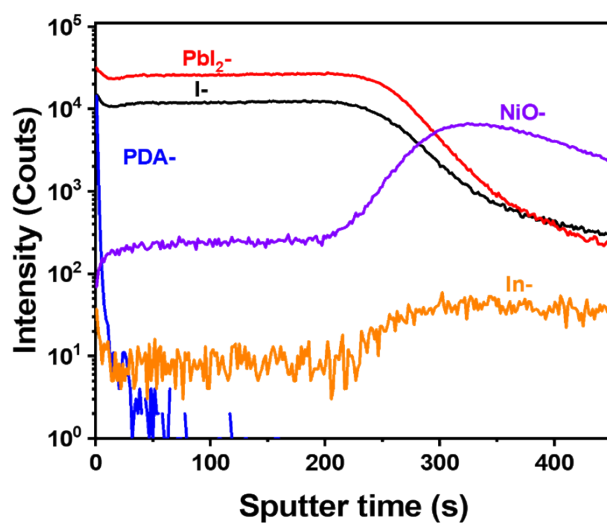

**Figure S9.** ToF-SIMS depth profiles of the control films treated with PDAI<sub>2</sub>.

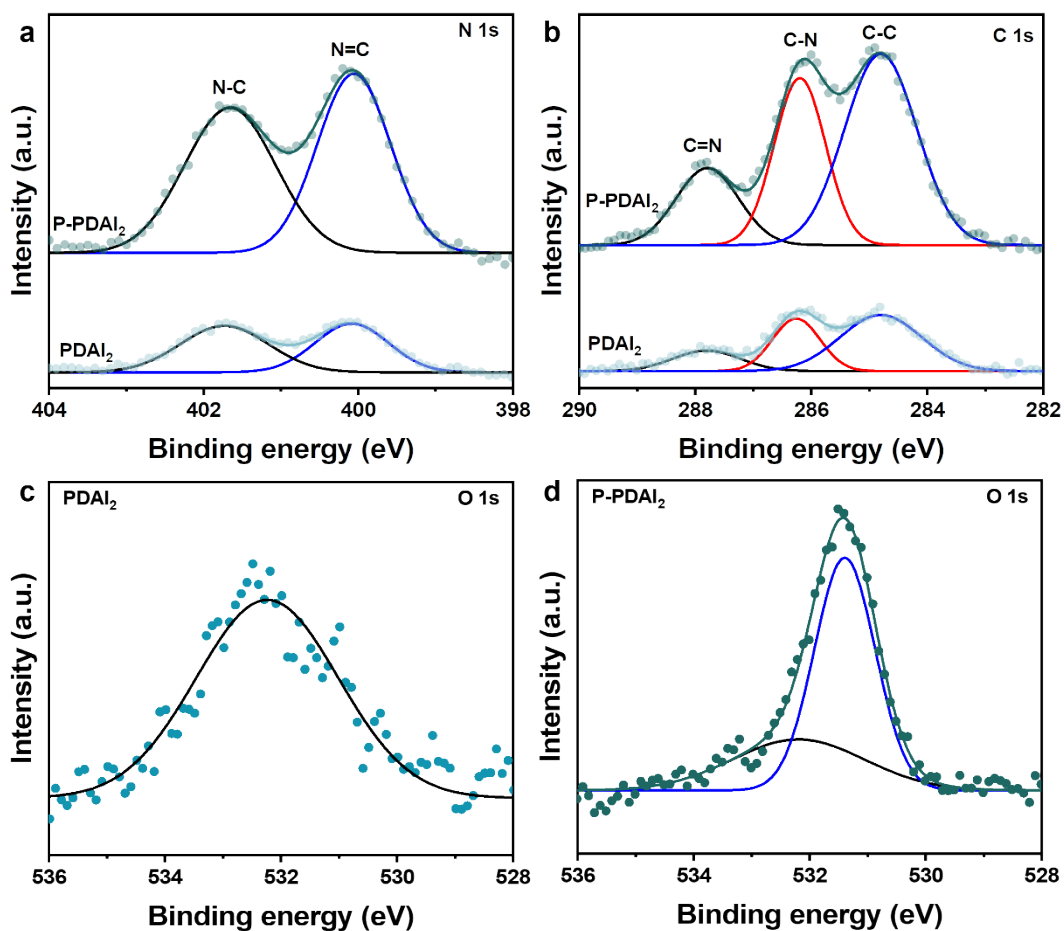

**Figure S10.** High resolution XPS spectra of (a) N 1s (b) C 1s (c) and (d) O 1s for the control and PPDA perovskite films with and without PDAI<sub>2</sub> treatment.

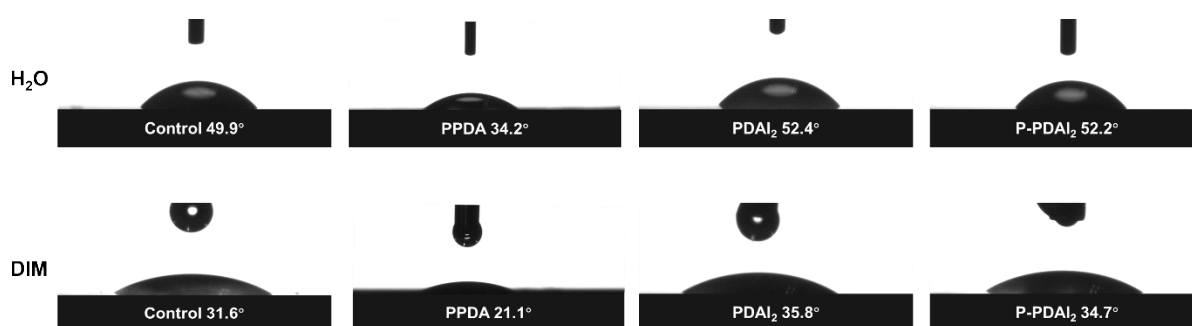

**Figure S11.** The contact angle (CA) of water and diiodomethane based on perovskite films without and with PPDA and PDAI<sub>2</sub> treatment.

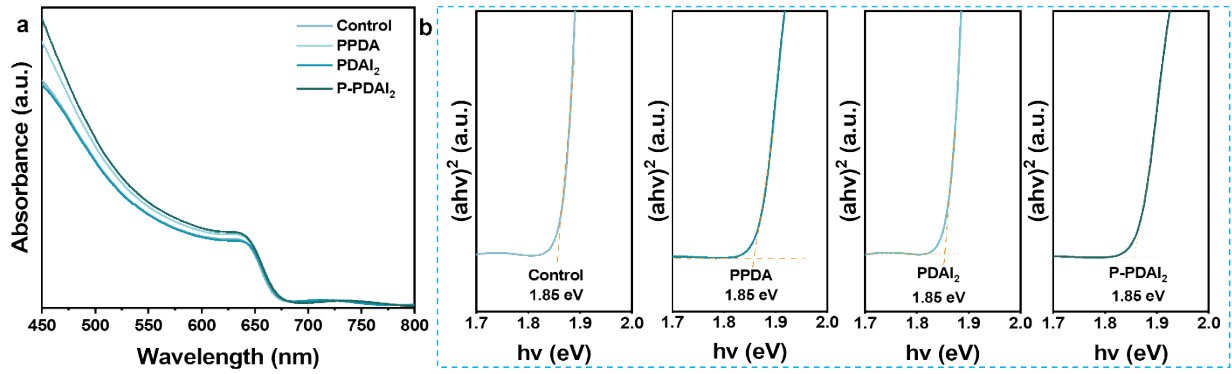

**Figure S12.** (a) The UV-Vis spectra of the control, PPDA, PDAI<sub>2</sub>, and P-PDAI<sub>2</sub> perovskite films. (b) Tauc plots of the control, PPDA, PDAI<sub>2</sub>, P-PDAI<sub>2</sub> perovskite films from UV-Vis absorption spectra, respectively.

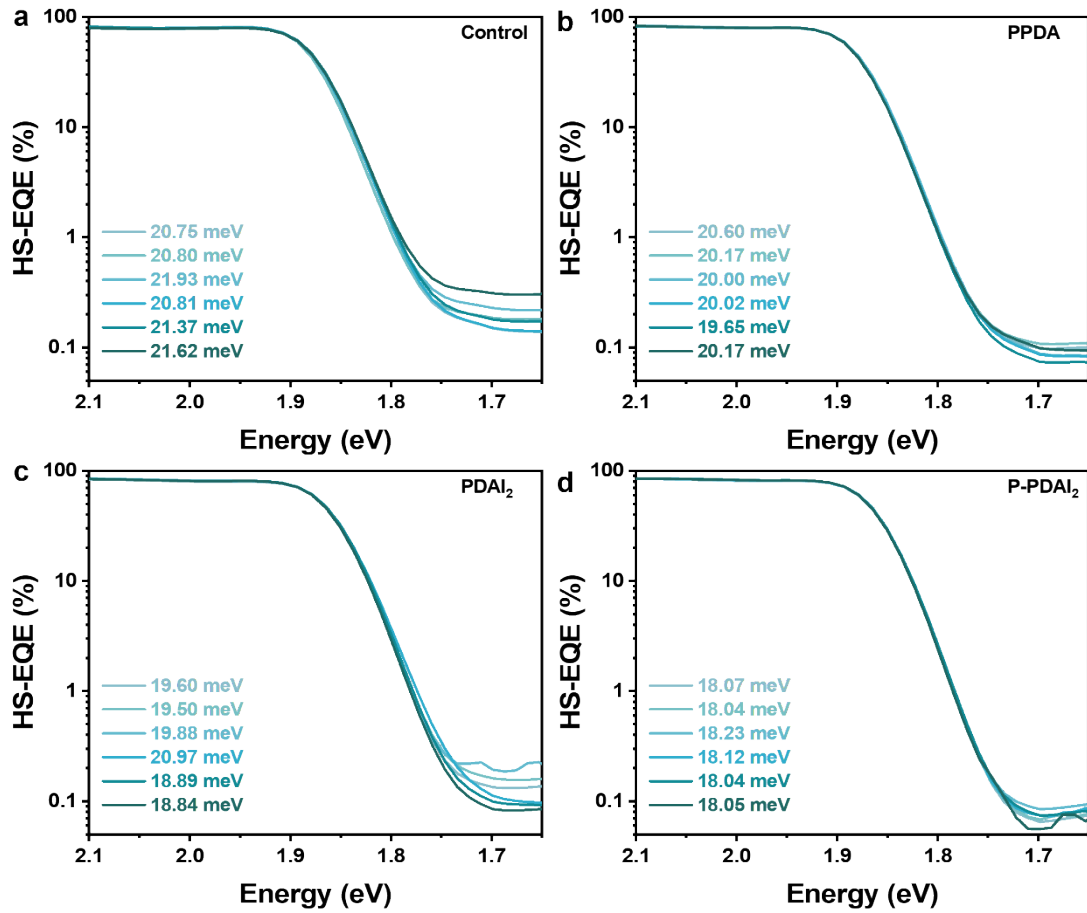

**Figure S13.** Urbach energy ( $E_U$ ) curves of (a) the control, (b) PPDA, (c) PDAI<sub>2</sub>, and (d) P-PDAI<sub>2</sub> treated devices.



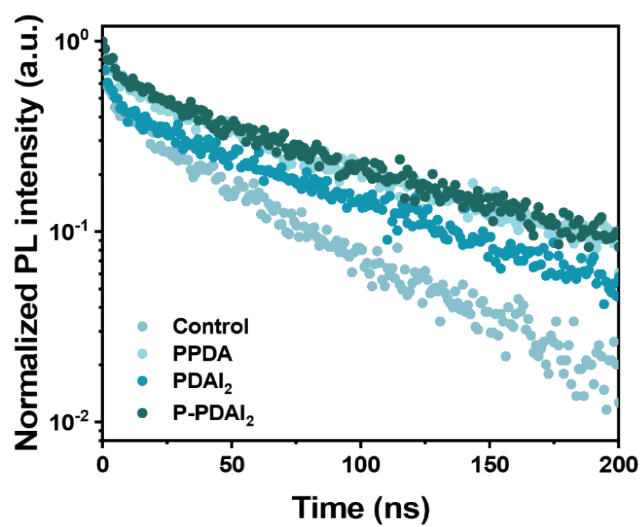

**Figure S14.** TRPL spectra of the control, PPDA, PDAI<sub>2</sub> and P-PDAI<sub>2</sub> perovskite films.

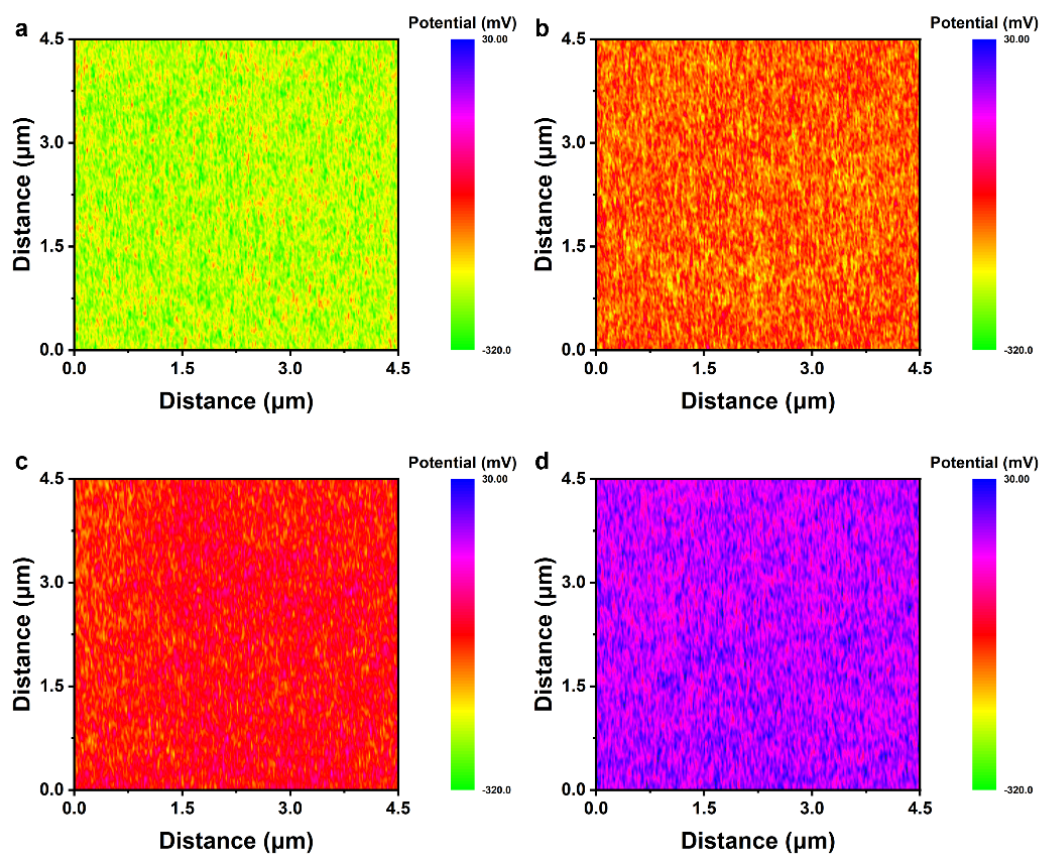

**Figure S15.** KPFM mapping of (a) the control, (b) PPDA (c) PDAI<sub>2</sub>, and (d) P-PDAI<sub>2</sub> treated perovskite films.



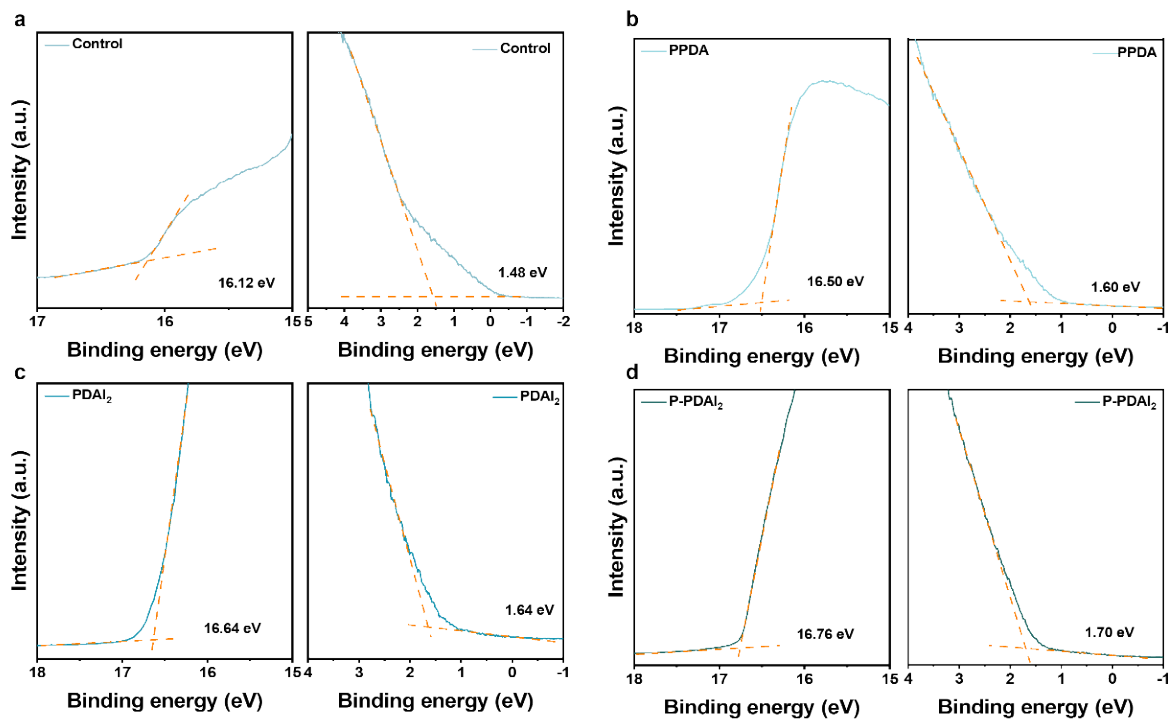

**Figure S16.** UPS spectra of (a) the control, (b) PPDA, (c) PDAI<sub>2</sub>, and (d) P-PDAI<sub>2</sub> treated perovskite films.

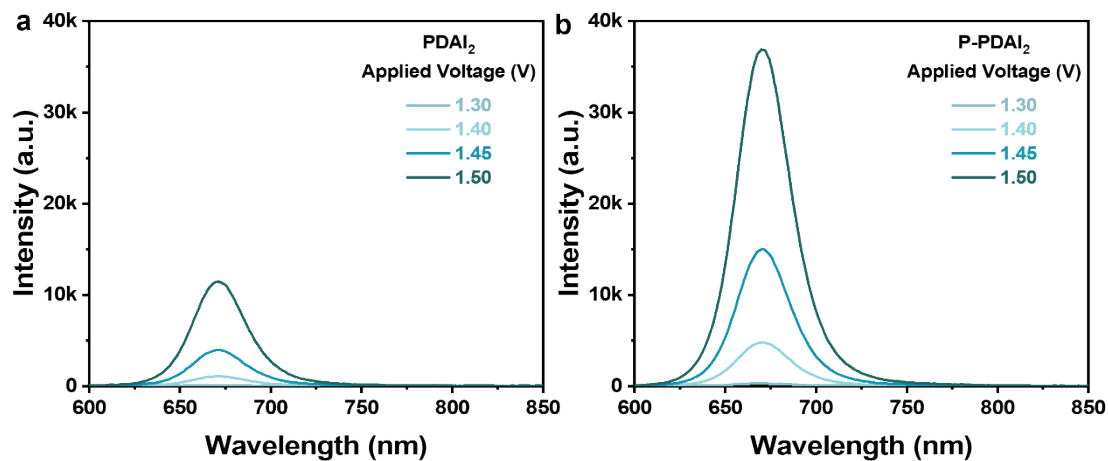

**Figure S17.** EL emission spectra of (a) PDAI<sub>2</sub> and (b) P-PDAI<sub>2</sub> treated devices with various applied voltages.

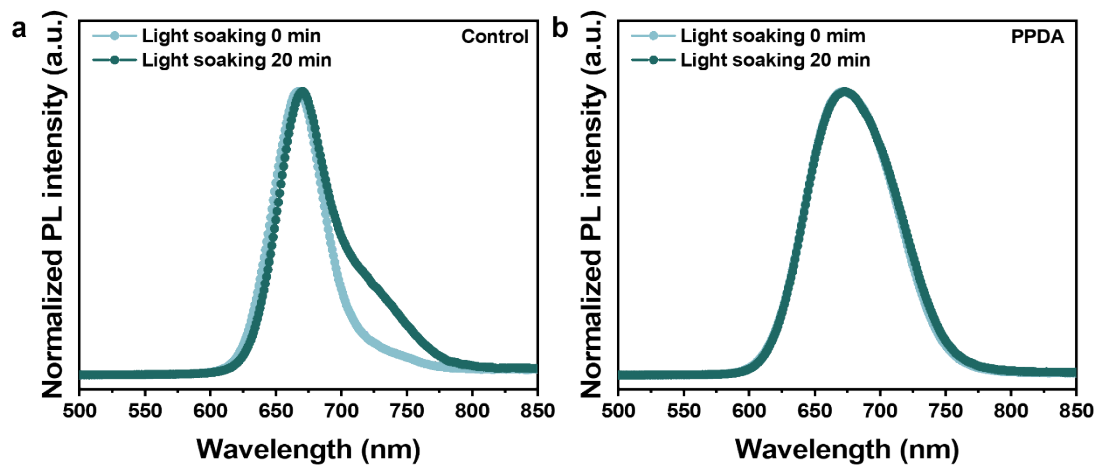

**Figure S18.** Steady-state PL spectra (a) the control and (b) PPDA treated films on glass substrate.

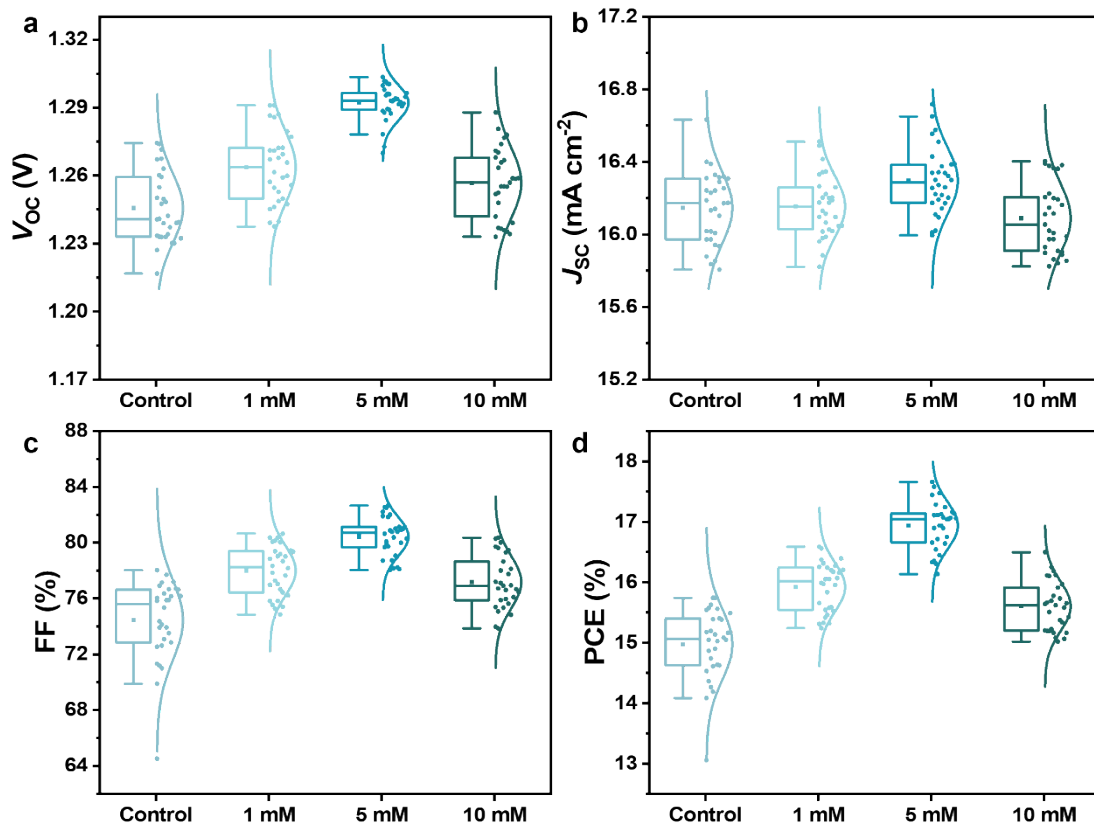

**Figure S19.** Statistics of the PV parameters for 30 individual devices based on different concentration of PPDA treatment.

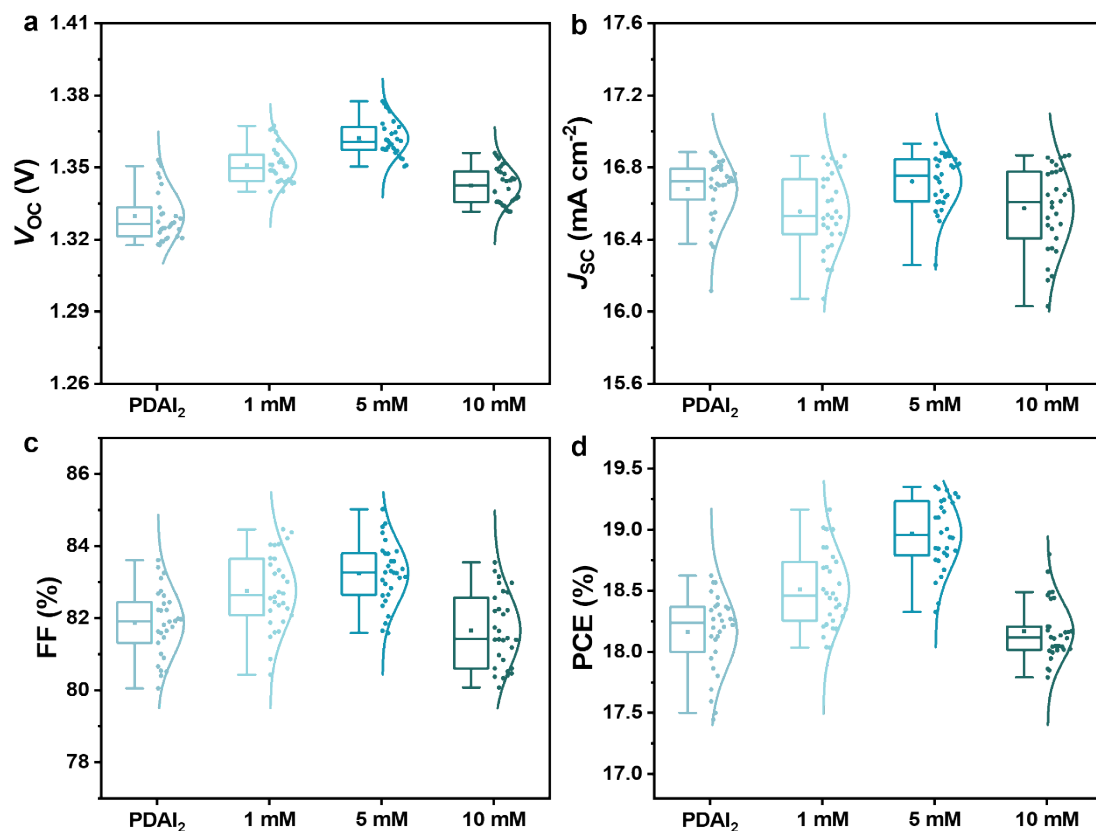

**Figure S20.** Statistics of the PV parameters for 30 individual devices based on different concentration of PPDA films treated with PDAI<sub>2</sub>.

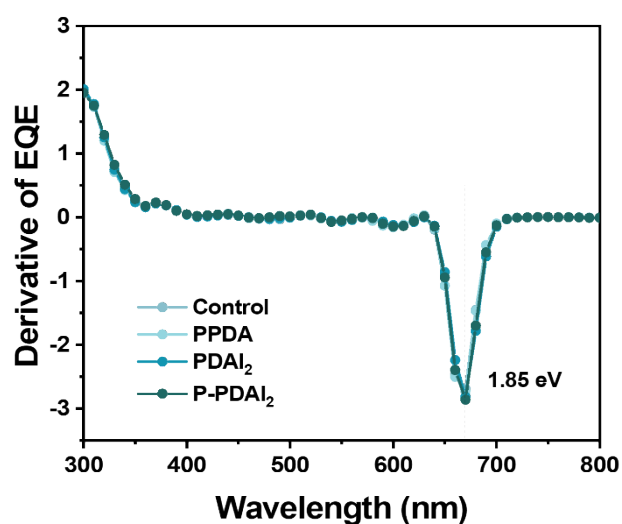

**Figure S21.** 1st derivative of the EQE spectra for all devices.

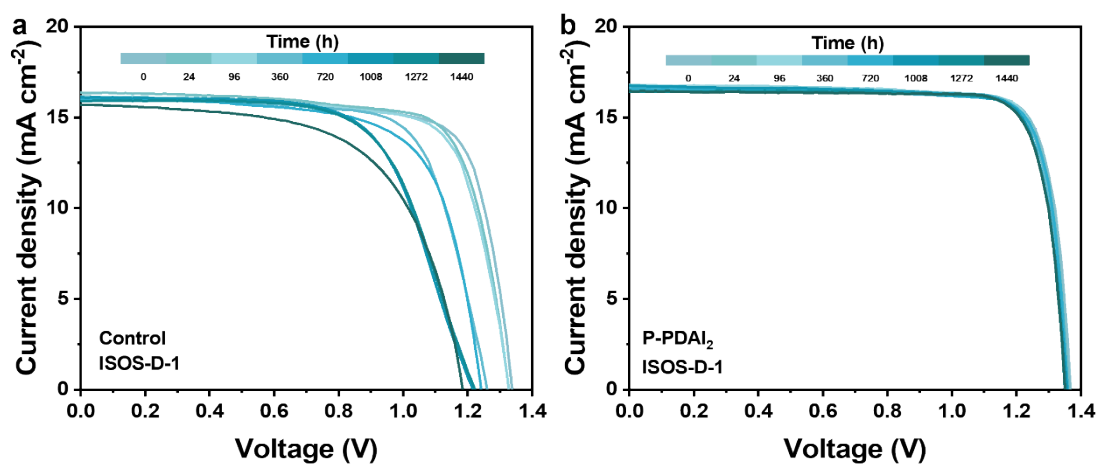

**Figure S22.**  $J$ - $V$  curves of (a) the control and (b) P-PDAI<sub>2</sub> based devices stored in a N<sub>2</sub> filled glovebox at room temperature.

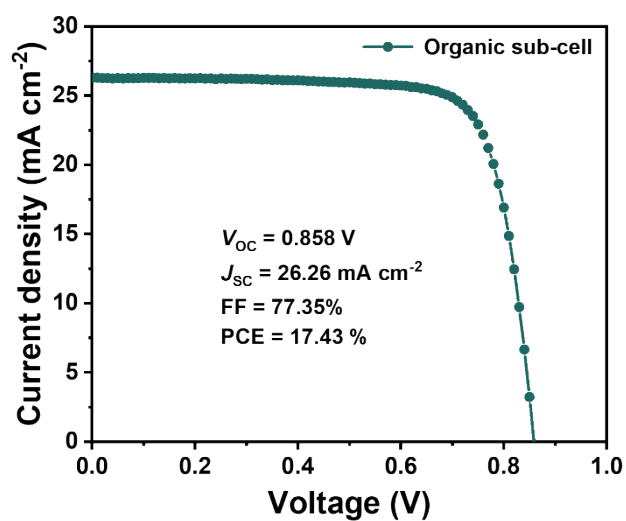

**Figure S23.**  $J$ - $V$  curve of single junction organic solar cells.

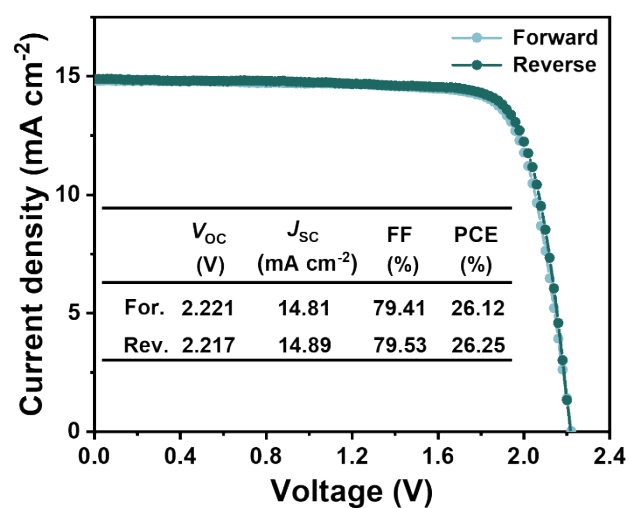

**Figure S24.**  $J$ - $V$  curves of POTSCs from reverse and forward scans.

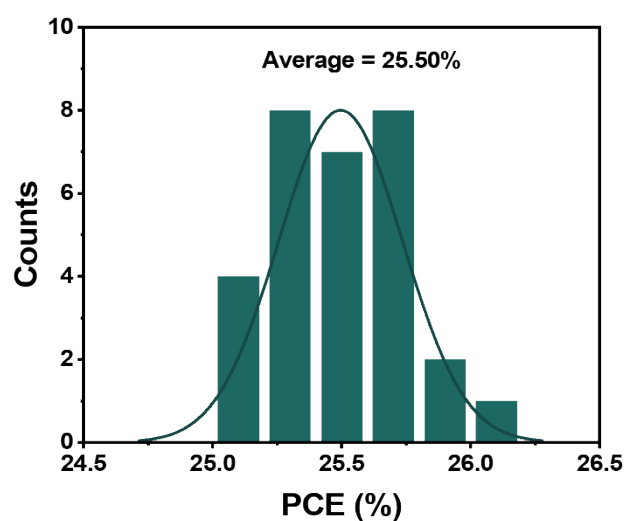

**Figure S25.** Statistical PCE data of the POTSCs.

## Supplementary Tables

**Table S1.** The calculated results of surface free energy ( $\gamma_s$ ). The projected area and actual surface area of substrates are extracted from AFM images.

| Substrate           | Projected area<br>( $\mu\text{m}^2$ ) | Surface area<br>( $\mu\text{m}^2$ ) | $r$   | $\gamma_s^p$<br>(mJ/m <sup>2</sup> ) | $\gamma_s^d$<br>(mJ/m <sup>2</sup> ) | $\gamma_s$<br>(mJ/m <sup>2</sup> ) |
|---------------------|---------------------------------------|-------------------------------------|-------|--------------------------------------|--------------------------------------|------------------------------------|
| Control             | 4.00                                  | 4.23                                | 1.058 | 17.15                                | 45.90                                | 63.05                              |
| PPDA                | 4.00                                  | 4.28                                | 1.070 | 24.52                                | 50.71                                | 75.23                              |
| PDAI <sub>2</sub>   | 4.00                                  | 4.14                                | 1.035 | 16.24                                | 42.97                                | 59.21                              |
| P-PDAI <sub>2</sub> | 4.00                                  | 4.12                                | 1.030 | 16.09                                | 43.32                                | 59.41                              |

**Table S2.** Parameters of the TRPL spectroscopies based on different samples.

| Samples                                       | $\tau_{\text{ave}}$ (ns) | $\tau_1$ (ns) | $\tau_2$ (ns) | $A_1$ | $A_2$ |
|-----------------------------------------------|--------------------------|---------------|---------------|-------|-------|
| Glass/Control perovskite                      | 47.87                    | 1.56          | 49.49         | 0.51  | 0.46  |
| Glass/PPDA-treated perovskite                 | 82.78                    | 4.93          | 85.87         | 0.38  | 0.55  |
| Glass/PDAI <sub>2</sub> -treated perovskite   | 78.10                    | 2.04          | 80.35         | 0.50  | 0.43  |
| Glass/P-PDAI <sub>2</sub> -treated perovskite | 83.38                    | 5.57          | 86.41         | 0.35  | 0.58  |

**Table S3.** Summary the PV parameters for 30 individual devices based on different concentration of PPDA.

|       | $V_{\text{OC}}$ (V) | $J_{\text{SC}}$ (mA cm <sup>-2</sup> ) | FF (%)       | PCE (%)      |
|-------|---------------------|----------------------------------------|--------------|--------------|
| 0     | 1.246 ± 0.015       | 16.14 ± 0.19                           | 74.45 ± 2.89 | 14.97 ± 0.59 |
| 1 mM  | 1.264 ± 0.015       | 16.15 ± 0.16                           | 77.99 ± 1.77 | 15.92 ± 0.40 |
| 5 mM  | 1.292 ± 0.008       | 16.29 ± 0.18                           | 80.44 ± 1.39 | 16.93 ± 0.38 |
| 10 mM | 1.257 ± 0.016       | 16.08 ± 0.19                           | 77.17 ± 1.89 | 15.60 ± 0.41 |

**Table S4.** Summary the PV parameters for 30 individual devices based on different concentration of PPDA treated with PDAI<sub>2</sub>.

|       | $V_{\text{OC}}$ (V) | $J_{\text{SC}}$ (mA cm <sup>-2</sup> ) | FF (%)       | PCE (%)      |
|-------|---------------------|----------------------------------------|--------------|--------------|
| 0     | 1.330 ± 0.011       | 16.68 ± 0.17                           | 81.87 ± 0.92 | 18.16 ± 0.31 |
| 1 mM  | 1.351 ± 0.007       | 16.56 ± 0.21                           | 82.76 ± 1.04 | 18.51 ± 0.31 |
| 5 mM  | 1.362 ± 0.006       | 16.72 ± 0.15                           | 83.25 ± 0.86 | 18.97 ± 0.28 |
| 10 mM | 1.343 ± 0.007       | 16.57 ± 0.23                           | 81.65 ± 0.23 | 18.16 ± 0.23 |

**Table S5.** Summary of champion photovoltaic parameters of WBG devices.

|                     | $V_{\text{OC}}$ (V) | $J_{\text{SC}}$ (mA cm <sup>-2</sup> ) | FF (%) | PCE (%) |
|---------------------|---------------------|----------------------------------------|--------|---------|
| Control             | 1.259               | 16.31                                  | 76.64  | 15.74   |
| PPDA                | 1.300               | 16.43                                  | 82.66  | 17.66   |
| PDAI <sub>2</sub>   | 1.353               | 16.74                                  | 82.23  | 18.62   |
| P-PDAI <sub>2</sub> | 1.378               | 16.65                                  | 84.37  | 19.35   |

**Table S6.** Summary of PV parameters for 1.85 eV WBG PSCs.

| Perovskite composition                                                                                     | $V_{\text{OC}}$ (V) | $J_{\text{SC}}$ (mA cm <sup>-2</sup> ) | FF (%) | PCE (%) | Ref |
|------------------------------------------------------------------------------------------------------------|---------------------|----------------------------------------|--------|---------|-----|
| Cs <sub>0.17</sub> FA <sub>0.83</sub> Pb(I <sub>0.44</sub> Br <sub>0.56</sub> ) <sub>3</sub>               | 1.259               | 15.9                                   | 73.4   | 14.7    | 12  |
| Cs <sub>0.2</sub> FA <sub>0.8</sub> Pb(I <sub>0.5</sub> Br <sub>0.5</sub> ) <sub>3</sub>                   | 1.34                | 15.6                                   | 81     | 16.8    | 13  |
| Cs <sub>0.2</sub> FA <sub>0.8</sub> Pb(I <sub>0.5</sub> Br <sub>0.5</sub> ) <sub>3</sub>                   | 1.35                | 16.78                                  | 83.29  | 18.87   | 14  |
| CsPb(I <sub>0.75</sub> Br <sub>0.25</sub> ) <sub>3</sub>                                                   | 1.334               | 16.98                                  | 81.61  | 18.49   | 15  |
| Cs <sub>0.1</sub> FA <sub>0.8</sub> MA <sub>0.1</sub> Pb(I <sub>0.5</sub> Br <sub>0.5</sub> ) <sub>3</sub> | 1.361               | 16.21                                  | 83.21  | 18.14   | 16  |
| Cs <sub>0.2</sub> FA <sub>0.8</sub> Pb(I <sub>0.5</sub> Br <sub>0.5</sub> ) <sub>3</sub>                   | 1.326               | 16.64                                  | 82.52  | 18.21   | 17  |
| Cs <sub>0.1</sub> FA <sub>0.8</sub> MA <sub>0.1</sub> Pb(I <sub>0.5</sub> Br <sub>0.5</sub> ) <sub>3</sub> | 1.361               | 16.27                                  | 83.34  | 18.45   | 18  |
| Cs <sub>0.2</sub> FA <sub>0.8</sub> Pb(I <sub>0.5</sub> Br <sub>0.5</sub> ) <sub>3</sub>                   | 1.339               | 16.46                                  | 86.39  | 19.06   | 19  |

|                                                                                              |       |       |       |       |           |
|----------------------------------------------------------------------------------------------|-------|-------|-------|-------|-----------|
| $\text{Cs}_{0.25}\text{FA}_{0.75}\text{Pb}(\text{I}_{0.5}\text{Br}_{0.5})_3$                 | 1.387 | 16.06 | 84.20 | 18.76 | 20        |
| $\text{Cs}_{0.2}\text{FA}_{0.8}\text{Pb}(\text{I}_{0.5}\text{Br}_{0.5})_3$                   | 1.320 | 16.2  | 83.4  | 17.6  | 21        |
| $\text{Cs}_{0.06}\text{FA}_{0.66}\text{MA}_{0.28}\text{Pb}(\text{I}_{0.5}\text{Br}_{0.5})_3$ | 1.357 | 16.49 | 84.86 | 19.00 | 22        |
| $\text{Cs}_{0.25}\text{FA}_{0.75}\text{Pb}(\text{I}_{0.5}\text{Br}_{0.5})_3$                 | 1.300 | 15.97 | 82.98 | 17.24 | 23        |
| $\text{Cs}_{0.2}\text{FA}_{0.8}\text{Pb}(\text{I}_{0.5}\text{Br}_{0.5})_3$                   | 1.378 | 16.64 | 84.37 | 19.35 | This Work |

**Table S7.** Time evolution of the PV parameters for WBG devices.

| Devices             | Time (h) | $V_{\text{OC}}$ (V) | $J_{\text{SC}}$ (mA cm <sup>-2</sup> ) | FF (%) | PCE (%) |
|---------------------|----------|---------------------|----------------------------------------|--------|---------|
| Control             | 00       | 1.277               | 16.14                                  | 74.74  | 15.41   |
|                     | 24       | 1.268               | 16.35                                  | 73.77  | 15.29   |
|                     | 96       | 1.268               | 16.14                                  | 73.19  | 14.97   |
|                     | 360      | 1.259               | 16.00                                  | 71.79  | 14.46   |
|                     | 720      | 1.241               | 16.02                                  | 69.15  | 13.75   |
|                     | 1008     | 1.215               | 16.09                                  | 64.77  | 12.67   |
|                     | 1272     | 1.223               | 15.91                                  | 64.74  | 12.60   |
|                     | 1440     | 1.184               | 15.72                                  | 61.35  | 11.41   |
|                     | 00       | 1.368               | 16.60                                  | 82.92  | 18.83   |
| P-PDAI <sub>2</sub> | 24       | 1.361               | 16.56                                  | 83.45  | 18.82   |
|                     | 96       | 1.357               | 16.79                                  | 82.59  | 18.82   |
|                     | 360      | 1.357               | 16.63                                  | 82.71  | 18.66   |
|                     | 720      | 1.357               | 16.57                                  | 82.80  | 18.62   |
|                     | 1008     | 1.356               | 16.76                                  | 81.52  | 18.85   |
|                     | 1272     | 1.350               | 16.44                                  | 82.87  | 18.40   |
|                     | 1440     | 1.351               | 16.45                                  | 82.75  | 18.38   |

**Table S8.** Summary of photovoltaic parameters of WBG, OSC and POTSC devices.

|       | $V_{\text{OC}}$ (V) | $J_{\text{SC}}$ (mA cm <sup>-2</sup> ) | FF (%) | PCE (%) |
|-------|---------------------|----------------------------------------|--------|---------|
| WBG   | 1.378               | 16.65                                  | 84.37  | 19.35   |
| OPV   | 0.858               | 26.26                                  | 77.35  | 17.43   |
| POTSC | 2.217               | 14.89                                  | 79.53  | 26.25   |

## References

- 1 D. Li, A. W. Neumann, *J. Colloid Interface Sci.* **1992**, 148, 190.
- 2 A. Kozbial, Z. Li, C. Conaway, R. McGinley, S. Dhingra, V. Vahdat, F. Zhou, B. D'Urso, H. Liu, L. Li, *Langmuir* **2014**, 30, 8598.
- 3 R. N. Wenzel, *Industrial & Engineering Chemistry* **1936**, 28, 988.
- 4 Q. Cao, T. Wang, X. Pu, X. He, M. Xiao, H. Chen, L. Zhuang, Q. Wei, H.-L. Loi, P.

- Guo, B. Kang, G. Feng, J. Zhuang, G. Feng, X. Li, F. Yan, *Adv. Mater.* **2024**, 36, 2311970.
- 5 Y. Zhou, G. Long, *J. Phys. Chem. C* **2017**, 121, 1455.
  - 6 M. Stolterfoht, P. Caprioglio, C. M. Wolff, J. A. Márquez, J. Nordmann, S. Zhang, D. Rothhardt, U. Hörmann, Y. Amir, A. Redinger, L. Kegelmann, F. Zu, S. Albrecht, N. Koch, T. Kirchartz, M. Saliba, T. Unold, D. Neher, *Energy Environ. Sci.* **2019**, 12, 2778.
  - 7 L. Liu, Z. Ying, X. Li, H. Du, M. Zhang, J. Wu, Y. Sun, H. Ma, Z. He, Y. Yu, X. Guo, J. Sun, Y. Zeng, X. Yang, J. Ye, *Adv. Energy Mater.* **2025**, 15, 2405675.
  - 8 Q. Han, S. H. Bae, P. Sun, Y. T. Hsieh, Y. M. Yang, Y. S. Rim, H. Zhao, Q. Chen, W. Shi, G. Li, Y. Yang, *Adv. Mater.* **2016**, 28, 2253.
  - 9 C. Zhu, X. Niu, Y. Fu, N. Li, C. Hu, Y. Chen, X. He, G. Na, P. Liu, H. Zai, Y. Ge, Y. Lu, X. Ke, Y. Bai, S. Yang, P. Chen, Y. Li, M. Sui, L. Zhang, H. Zhou, Q. Chen, *Nat. Commun.* **2019**, 10, 815.
  - 10 W. Peng, K. Mao, F. Cai, H. Meng, Z. Zhu, T. Li, S. Yuan, Z. Xu, X. Feng, J. Xu, M. D. McGehee, J. Xu, *Science* **2023**, 379, 683.
  - 11 W. Tress, N. Marinova, O. Inganäs, M. K. Nazeeruddin, S. M. Zakeeruddin, M. Graetzel, *Adv. Energy Mater.* **2015**, 5, 1400812.
  - 12 S. Gharibzadeh, I. M. Hossain, P. Fassel, B. A. Nejand, T. Abzieher, M. Schultes, E. Ahlswede, P. Jackson, M. Powalla, S. Schäfer, M. Rienäcker, T. Wietler, R. Peibst, U. Lemmer, B. S. Richards, U. W. Paetzold, *Adv. Funct. Mater.* **2020**, 30, 1909919.
  - 13 K. O. Brinkmann, T. Becker, F. Zimmermann, C. Kreusel, T. Gahlmann, M. Theisen, T. Haeger, S. Olthof, C. Tückmantel, M. Günster, T. Maschwitz, F. Göbelmann, C. Koch, D. Hertel, P. Caprioglio, F. Peña-Camargo, L. Perdigón-Toro, A. Al-Ashouri, L. Merten, A. Hinderhofer, L. Gomell, S. Zhang, F. Schreiber, S. Albrecht, K. Meerholz, D. Neher, M. Stolterfoht, T. Riedl, *Nature* **2022**, 604, 280.
  - 14 X. Wang, D. Zhang, B. Liu, X. Wu, X. Jiang, S. Zhang, Y. Wang, D. Gao, L. Wang, H. Wang, Z. Huang, X. Xie, T. Chen, Z. Xiao, Q. He, S. Xiao, Z. Zhu, S. Yang, *Adv. Mater.* **2023**, 35, 2305946.
  - 15 H. Xiao, C. Zuo, L. Zhang, W. Zhang, F. Hao, C. Yi, F. Liu, H. Jin, L. Ding, *Nano Energy* **2023**, 106, 108061.
  - 16 Y. An, N. Zhang, Z. Zeng, Y. Cai, W. Jiang, F. Qi, L. Ke, F. R. Lin, S.-W. Tsang, T. Shi, A. K. Y. Jen, H.-L. Yip, *Adv. Mater.* **2024**, 36, 2306568.
  - 17 X. Wu, D. Zhang, B. Liu, Y. Wang, X. Wang, Q. Liu, D. Gao, N. Wang, B. Li, L. Wang, Z. Yu, X. Li, S. Xiao, N. Li, M. Stolterfoht, Y. H. Lin, S. Yang, X. C. Zeng, Z. Zhu, *Adv.*



*Mater.* **2024**, 36, 2410692.

- 18 Y. An, N. Zhang, Q. Liu, W. Jiang, G. Du, D. Chen, M. Liu, X. Huang, T. Lei, Q. Qiu, F. R. Lin, X. C. Zeng, A. K. Y. Jen, H.-L. Yip, *Nat. Commun.* **2025**, 16, 2759.
- 19 W. Peng, Y. Zhang, X. Zhou, J. Wu, D. Wang, G. Qu, J. Zeng, Y. Xu, B. Jiang, P. Zhu, Y. Du, Z. Li, X. Lei, Z. Liu, L. Yan, X. Wang, B. Xu, *Energy Environ. Sci.* **2025**, 18, 874.
- 20 Z. Song, J. Wang, Y. Bao, J. Zeng, D. Wang, J. He, P. Zhu, B. Jiang, Z. Liu, S. He, Y. Hou, Z. Hu, C. Xie, Y. Chen, Y. Liu, X. Wang, B. Xu, *Energy Environ. Sci.* **2025**, 18, 4883.
- 21 Y. Wang, B. Liu, D. Zhang, H. Yu, X. Wu, D. Gao, B. Li, C. Zhang, W. Liu, Z. Yu, N. Wang, L. Wang, X. Li, H. Yan, Z. Zhu, *Small* **2025**, 21, e2411031.
- 22 G. Xie, H. Li, J. Fang, X. Wang, H. Peng, D. Lin, N. Huang, L. Gan, W. Li, R. Jiang, T. Bu, F. Huang, S. He, L. Qiu, *Angew. Chem. Int. Ed.* **2025**, 64, 202501764.
- 23 X. Sun, F. Wang, G. Yang, X. Ding, J. Lv, Y. Sun, T. Wang, C. Gao, G. Zhang, W. Liu, X. Xu, S. Satapathi, X. Ouyang, A. Ng, L. Ye, M. Yuan, H. Zhang, H. Hu, *Energy Environ. Sci.* **2025**, 18, 2536.
